# Supplementary material for: A Pan-European, High-Resolution, Daily Total, Fine-Mode and Coarse-Mode Aerosol Optical Depth dataset based on Quantile Machine Learning
Source: Copernicus journal article supplement (doi:10.5194/essd-2023-104), 2023-03-27
Supplement: Supplementary file 1 [file essd-2023-104-supplement.pdf]

# Supplementary materials to “Pan-European, High-Resolution, Daily Estimates of Total, Fine-Mode and Coarse-Mode Aerosol Optical Depth based on Quantile Machine Learning”

Zhao-Yue Chen<sup>1,4</sup>, Raul Méndez<sup>1</sup>, Hervé Petetin<sup>2</sup>, Aleksander Lacima<sup>2</sup>, Carlos Pérez García-Pando<sup>2,3</sup> and Joan Ballester<sup>1</sup>

<sup>1</sup>ISGLOBAL, Barcelona, Spain

<sup>2</sup>Barcelona Supercomputing Center, Barcelona, Spain

<sup>3</sup>ICREA, Catalan Institution for Research and Advanced Studies, Barcelona, Spain

<sup>4</sup>Universitat Pompeu Fabra (UPF), Barcelona, Spain

## Contents

|                                                 |    |
|-------------------------------------------------|----|
| Contents .....                                  | 1  |
| 1. Supplementary Figure .....                   | 2  |
| 2. Supplementary Table .....                    | 15 |
| 3. Preliminary analysis for satellite AOD ..... | 21 |
| 3.1 Study design .....                          | 21 |
| 3.2 Preliminary results .....                   | 21 |

# 1. Supplementary Figure

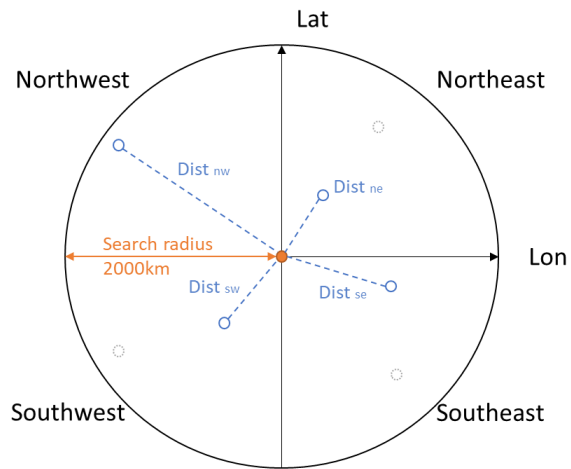

**Figure S1.** the sketch map of spatial calibration variables ( $Dist_{direction}$ ) calculation. Within 4000km search radius, Orange point is the target/predicted point; Four blue points are the nearest sites in different directions and grey points

## Supplementary Figure

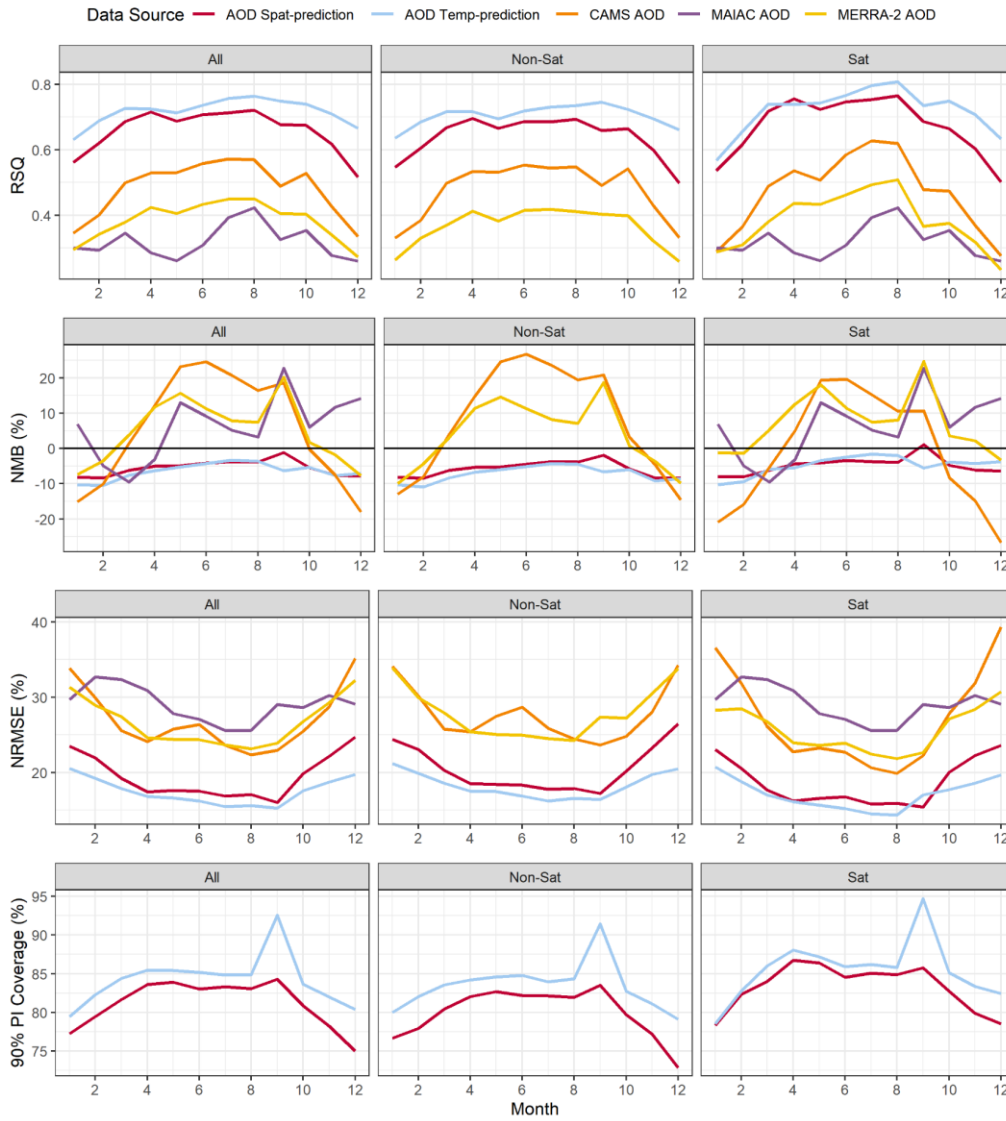

**Figure S2.** the monthly performance (Rsquare, NMB, NRMSE, 90% PI (predictive intervals) coverage) comparison between different data sources: QML spatial out-of-sample prediction (AOD Spat-Prediction), temporal out-of-sample prediction (AOD Temp-Prediction), CAMS AOD, MAIAC (Satellite) AOD, MERRA-2 AOD.

## Supplementary Figure

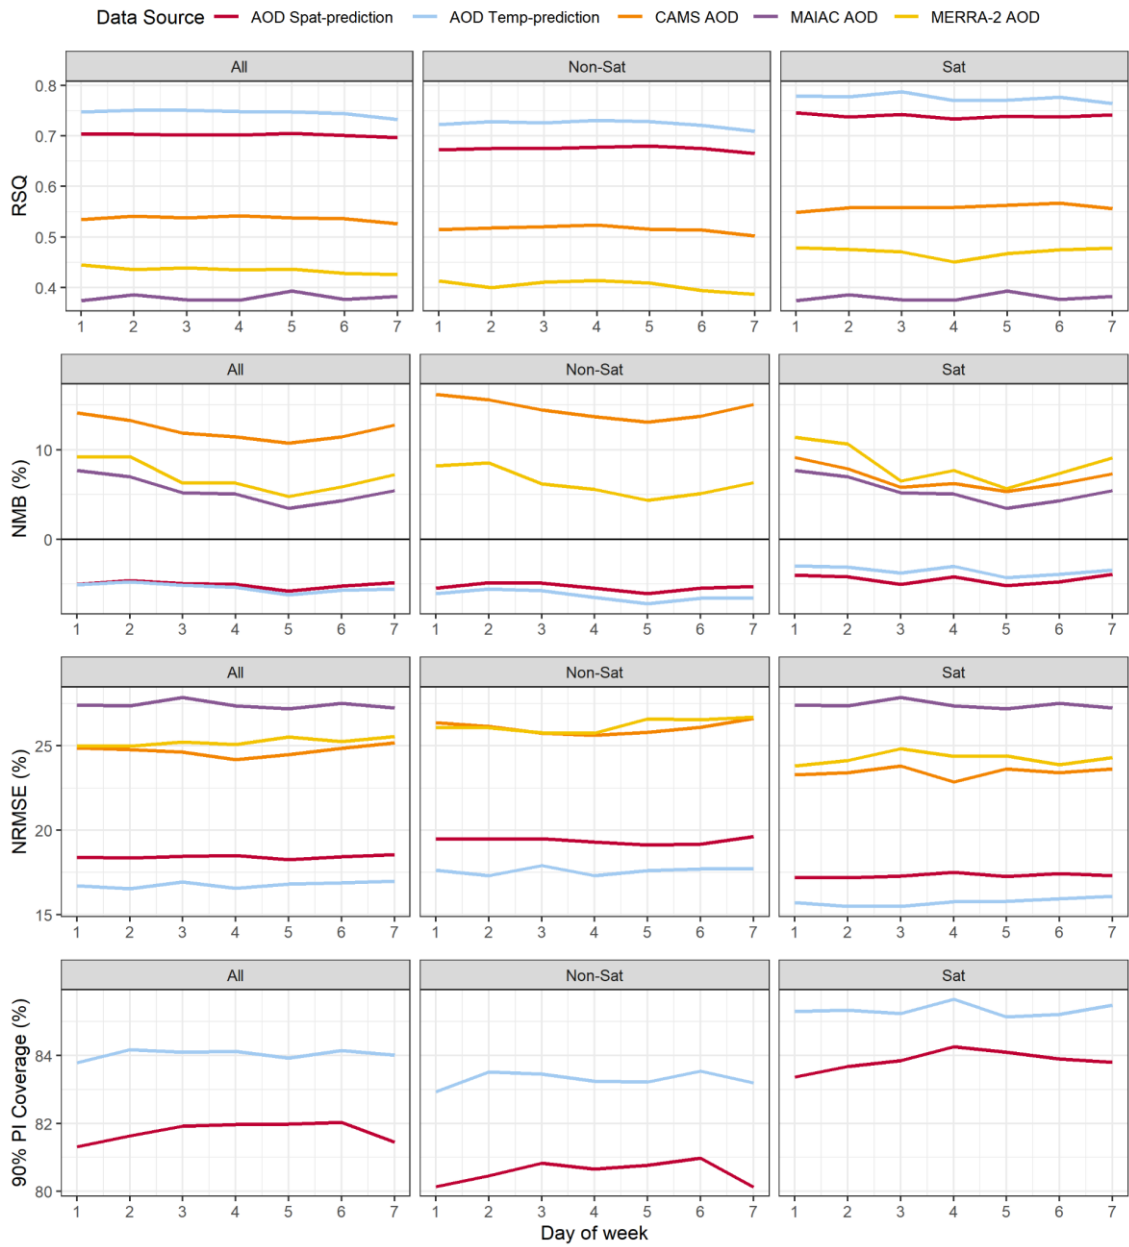

**Figure S3.** the weekly performance (Rsquare, NMB, NRMSE, 90% PI (predictive intervals) coverage) comparison between different data sources: QML spatial out-of-sample prediction (AOD Spat-Prediction), temporal out-of-sample prediction (AOD Temp-Prediction), CAMS AOD, MAIAC (Satellite) AOD, MERRA-2 AOD.

## Supplementary Figure

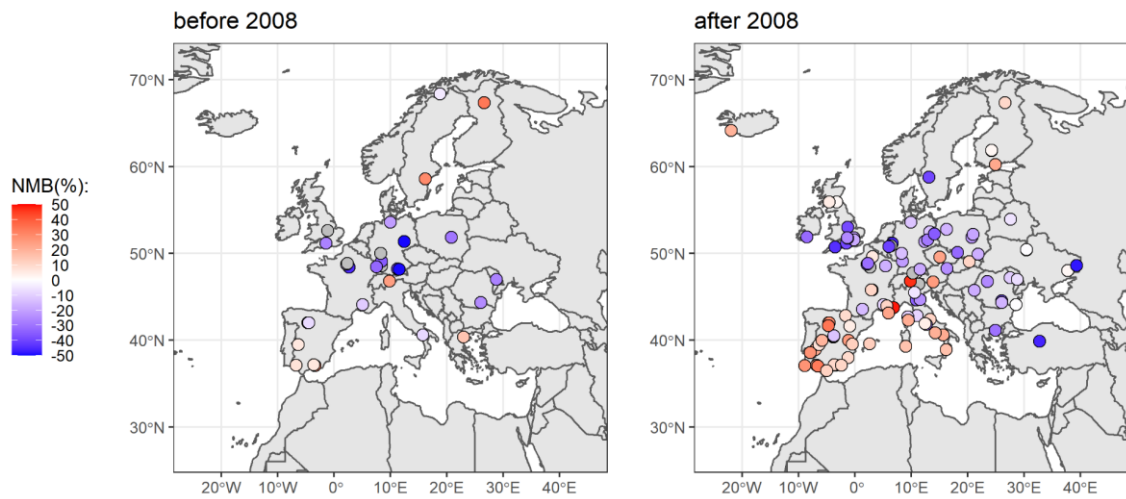

**Figure S4.** the spatial distribution maps of normalize mean bias (NMB) for the Phy-DL Satellite fAOD (PDL MAIAC fAOD) before 2008 and after 2008

## Supplementary Figure

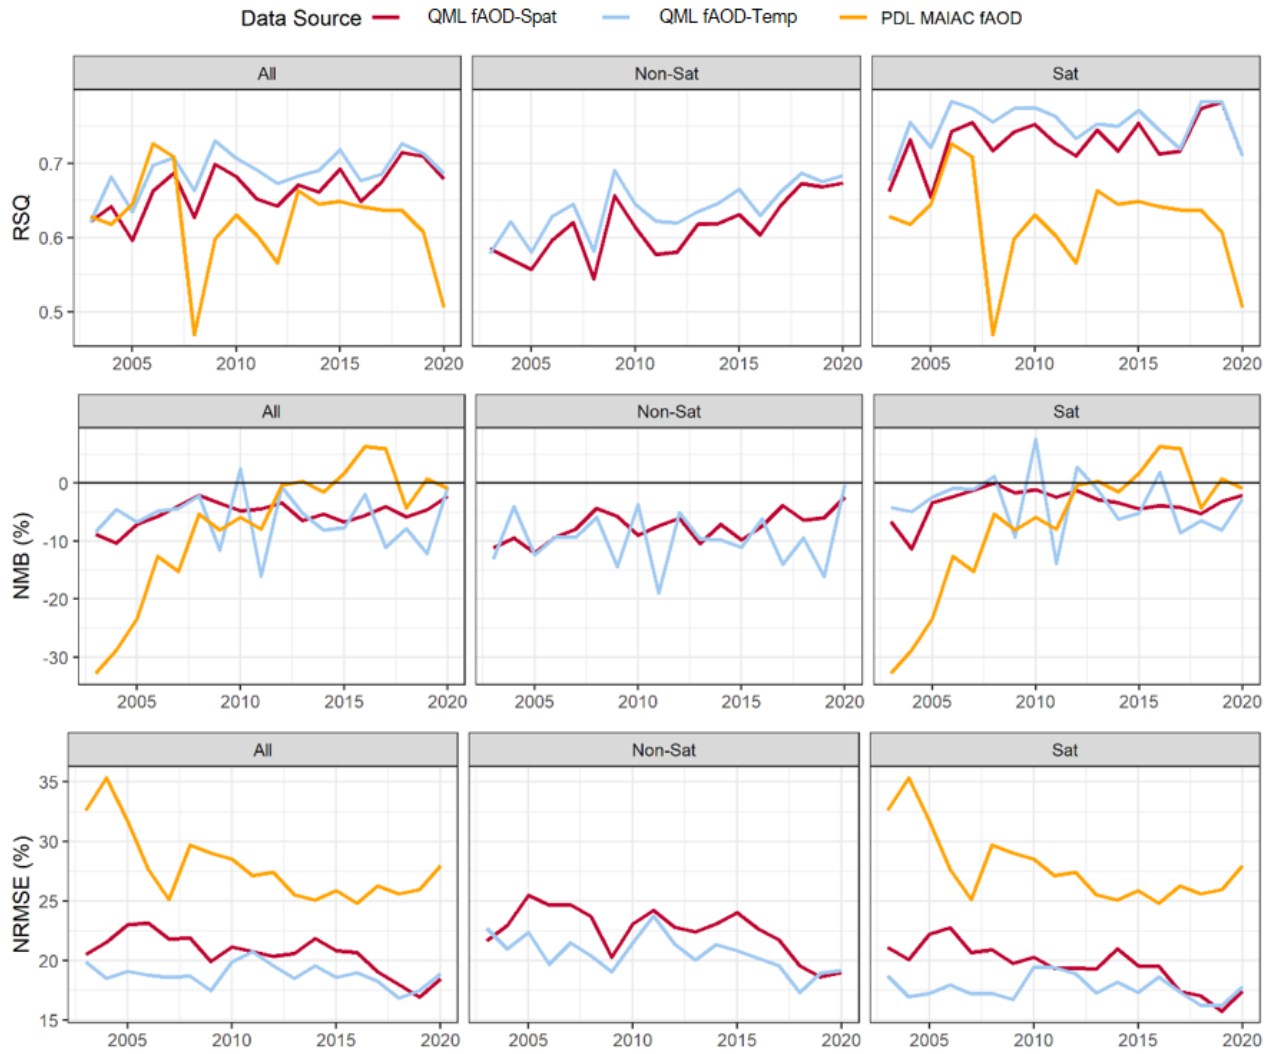

**Figure S5.** the annual performance (R-squared, NMB, NRMSE) comparison between different data sources: QML spatial out-of-sample prediction (fAOD Spat-Prediction), temporal out-of-sample prediction (fAOD Temp-Prediction), Phy-DL Satellite fAOD(PDL MAIAC fAOD).

## Supplementary Figure

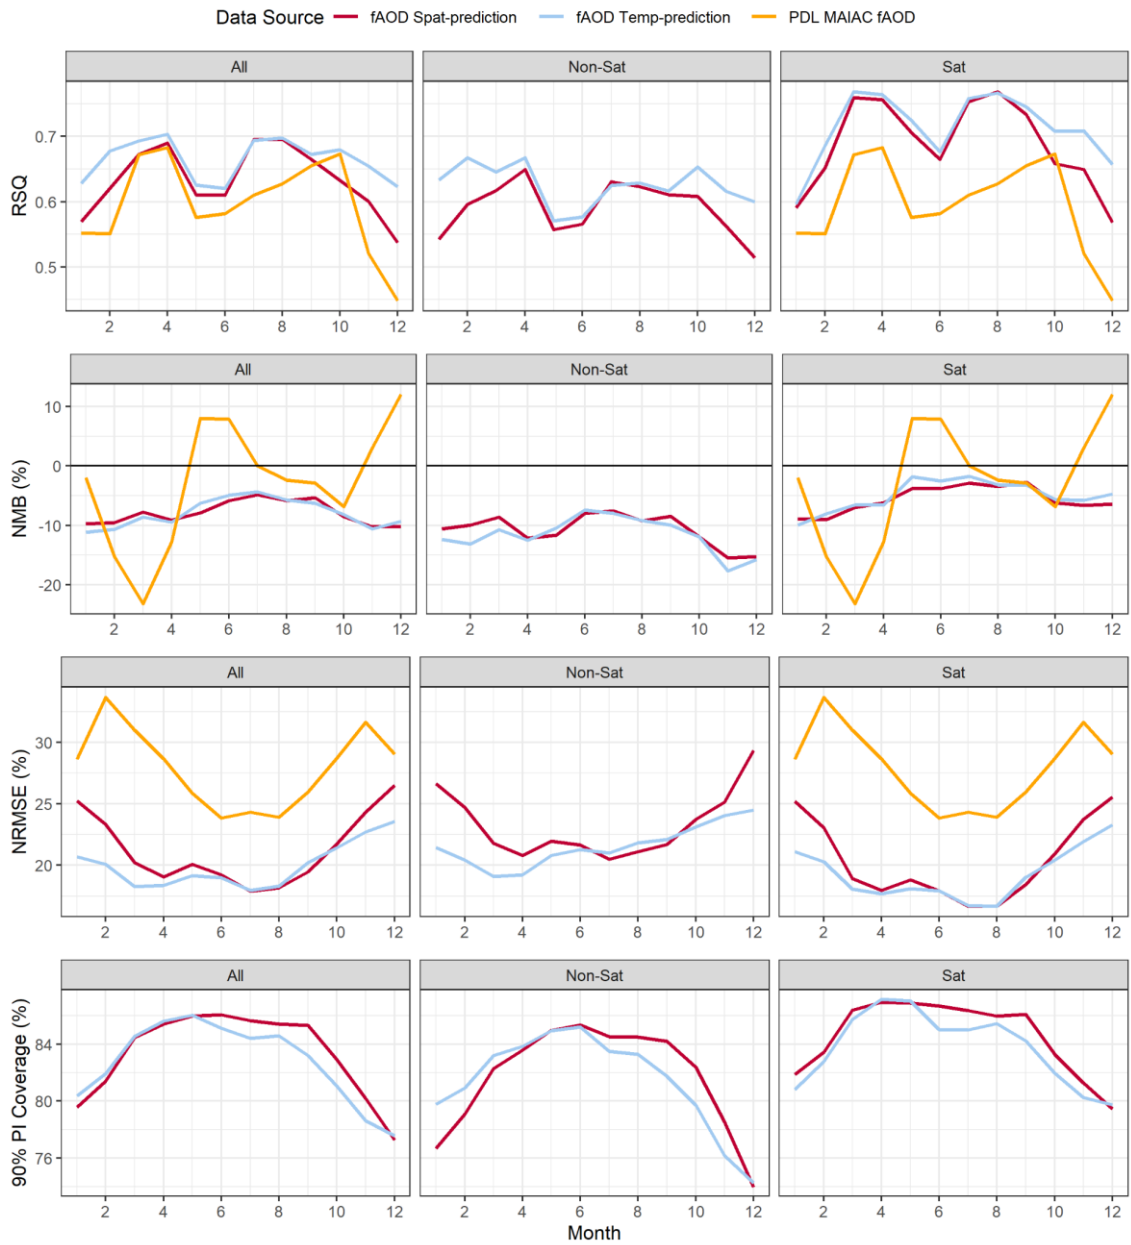

**Figure S6.** the monthly performance (Rsquare, NMB, NRMSE, 90% PI (predictive intervals) coverage) comparison between different data sources: QML spatial out-of-sample prediction (fAOD Spat-Prediction), temporal out-of-sample prediction (fAOD Temp-Prediction), Phy-DL Satellite fAOD(PDL MAIAC fAOD).

## Supplementary Figure

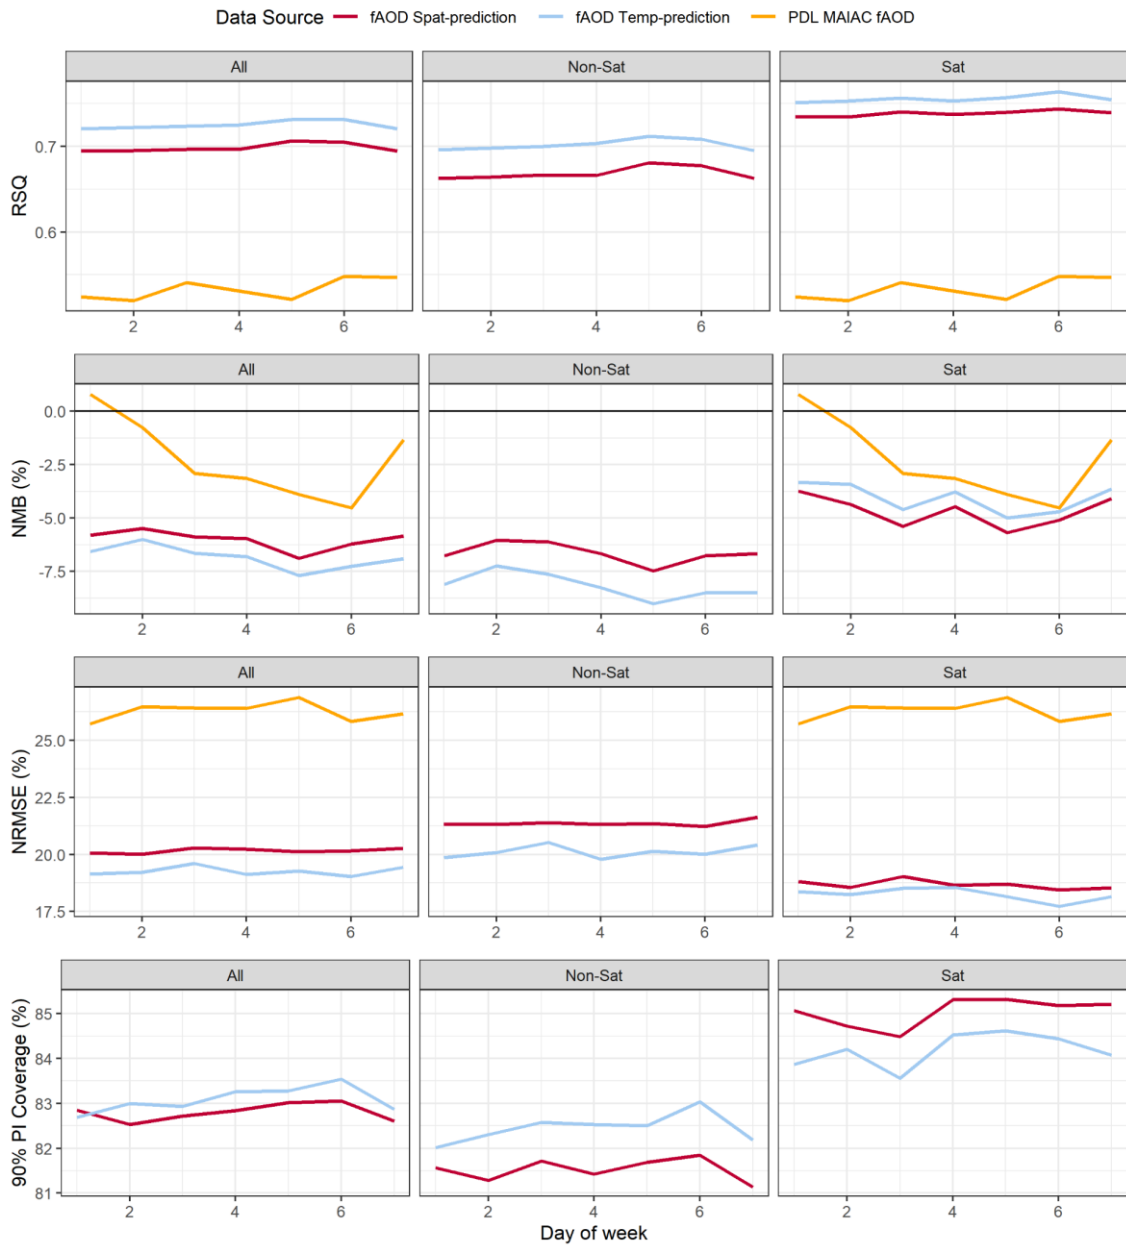

**Figure S7.** the weekly performance (Rsquare, NMB, NRMSE, 90% PI (predictive intervals) coverage) comparison between different data sources: QML spatial out-of-sample prediction (fAOD Spat-Prediction), temporal out-of-sample prediction (fAOD Temp-Prediction), Phy-DL Satellite fAOD(PDL MAIAC fAOD).



## Supplementary Figure

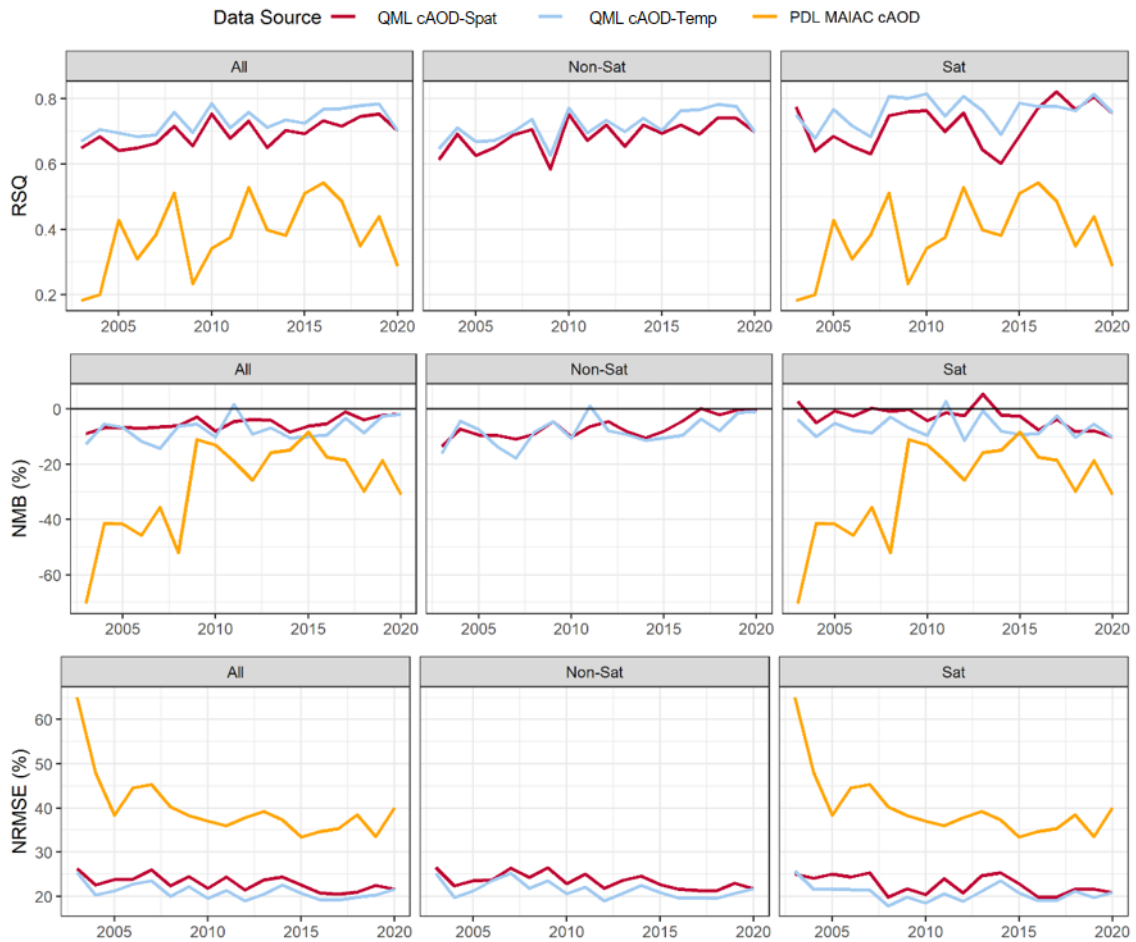

**Figure s8.** the performance (R-squared, NMB, NRMSE) comparison between different data sources over years: our spatial out-of-sample prediction (cAOD Spat-Prediction), temporal out-of-sample prediction (cAOD Temp-Prediction) and Phy-DL Satellite cAOD (PDL MAIAC cAOD).

## Supplementary Figure

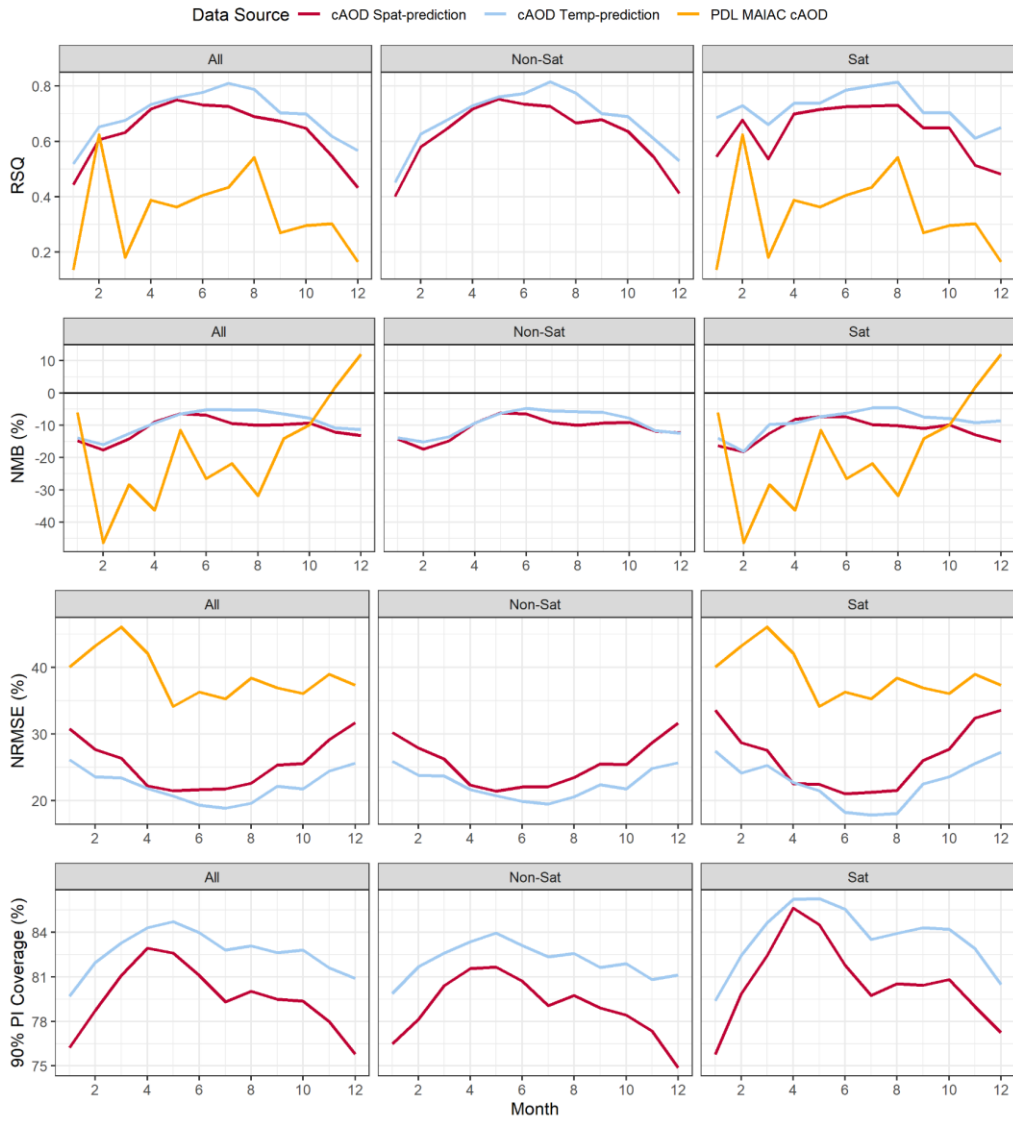

**Figure S9.** the monthly performance (Rsquare, NMB, NRMSE, 90% PI (predictive intervals) coverage) comparison between different data sources: QML spatial out-of-sample prediction (cAOD Spat-Prediction), temporal out-of-sample prediction (cAOD Temp-Prediction), Phy-DL Satellite cAOD(PDL MAIAC cAOD).

## Supplementary Figure

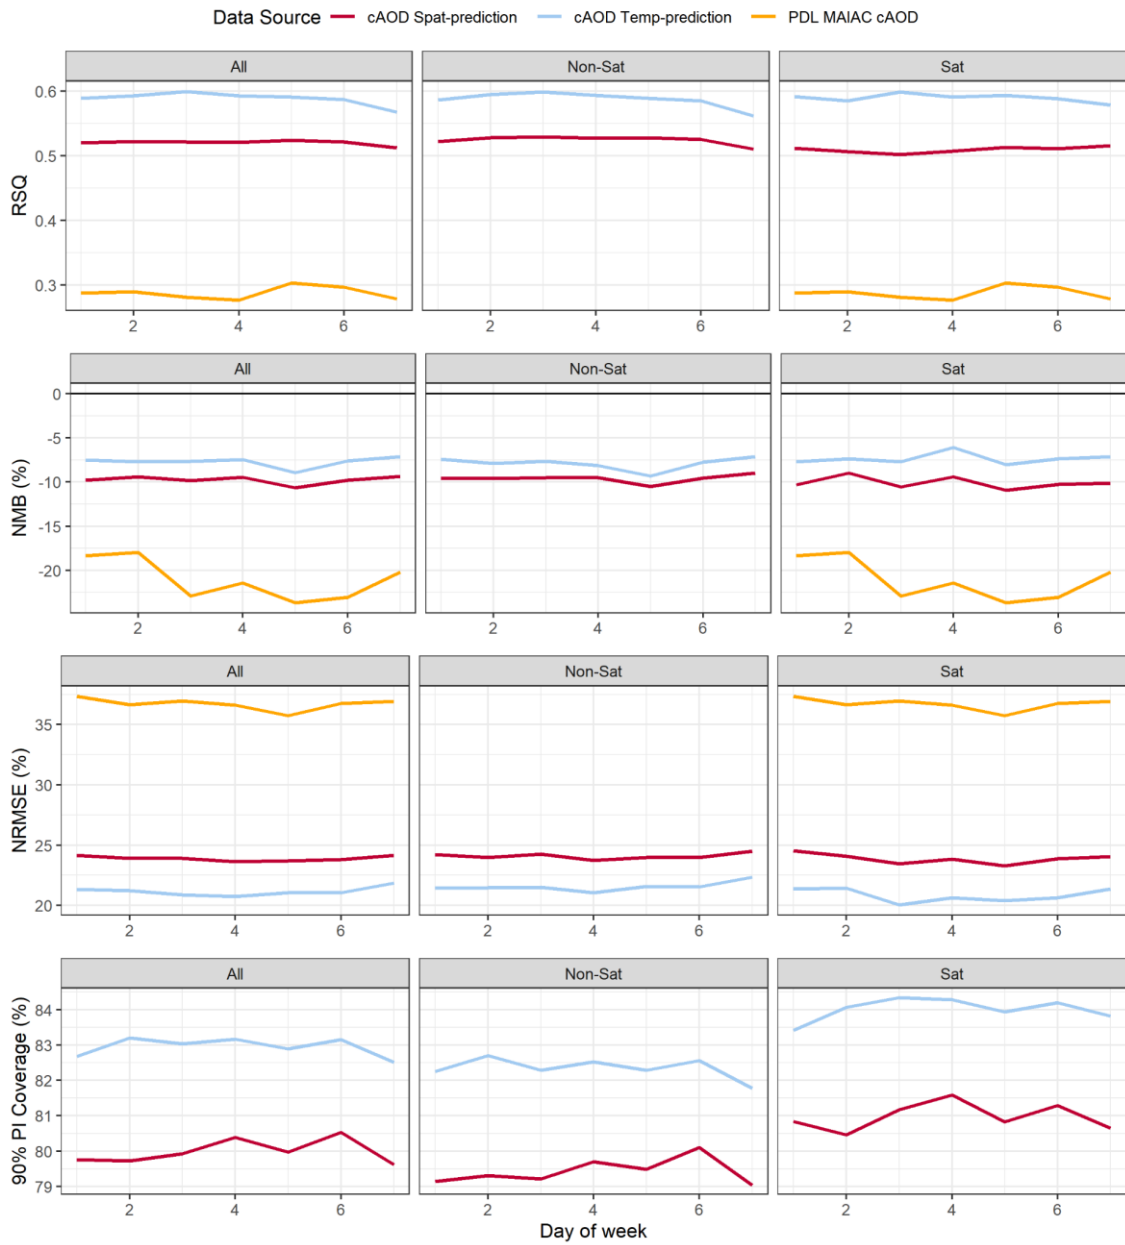

**Figure S10.** the weekly performance (Rsquare, NMB, NRMSE, 90% PI (predictive intervals) coverage) comparison between different data sources: QML spatial out-of-sample prediction (cAOD Spat-Prediction), temporal out-of-sample prediction (cAOD Temp-Prediction), Phy-DL Satellite cAOD(PDL MAIAC cAOD).

## Supplementary Figure

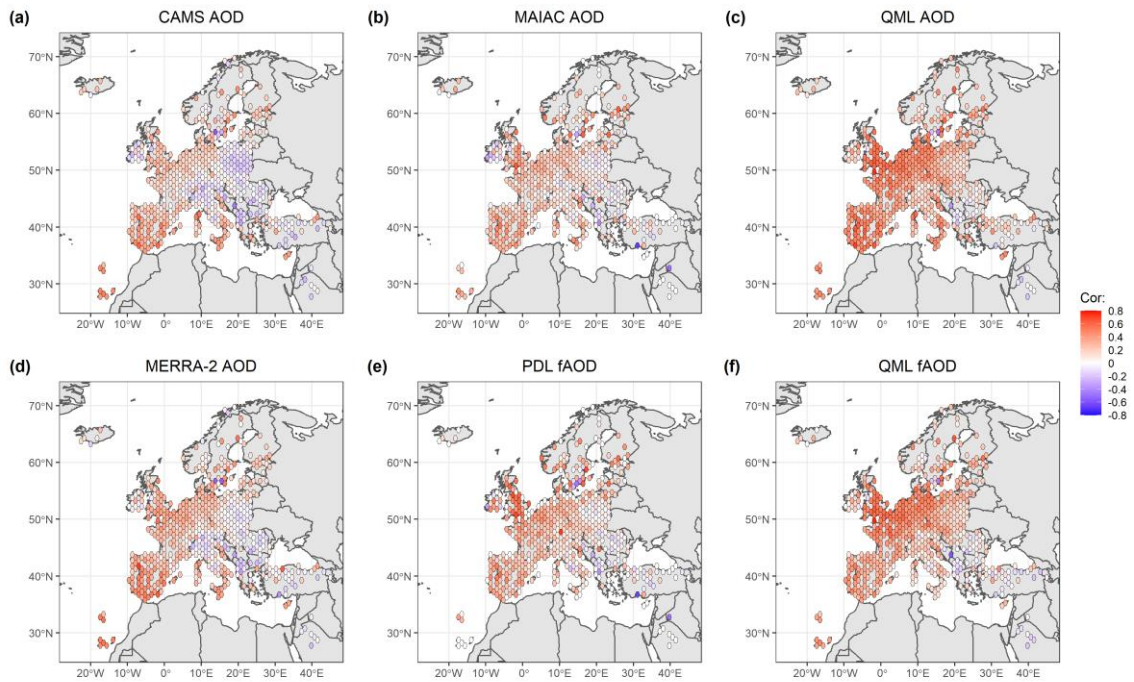

**Figure S11.** the correlation maps between PM10 and 6 different AOD product 2003-2020: CAMS AOD, MERRA-2 AOD, Satellite AOD, Phy-DL Satellite fAOD (PDL MAIAC fAOD), QML total AOD predictions (QML AOD), and QML fine-mode AOD predictions (QML fAOD)

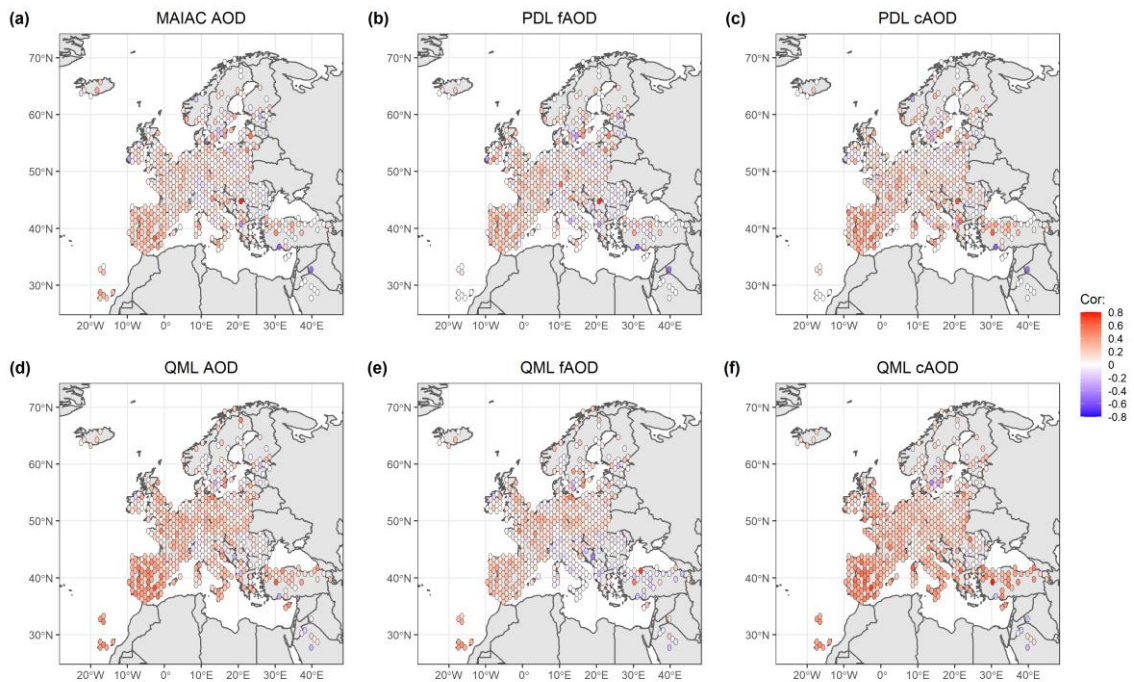

**Figure S12.** the correlation maps between Coarse PM and 6 different AOD product 2003-2020: Satellite AOD, Phy-DL Satellite fAOD (PDL MAIAC fAOD), Phy-DL Satellite cAOD (PDL MAIAC cAOD), QML total AOD (QML AOD), fine-mode AOD predictions (QML fAOD) and coarse-mode AOD predictions (QML cAOD).

## Supplementary Figure

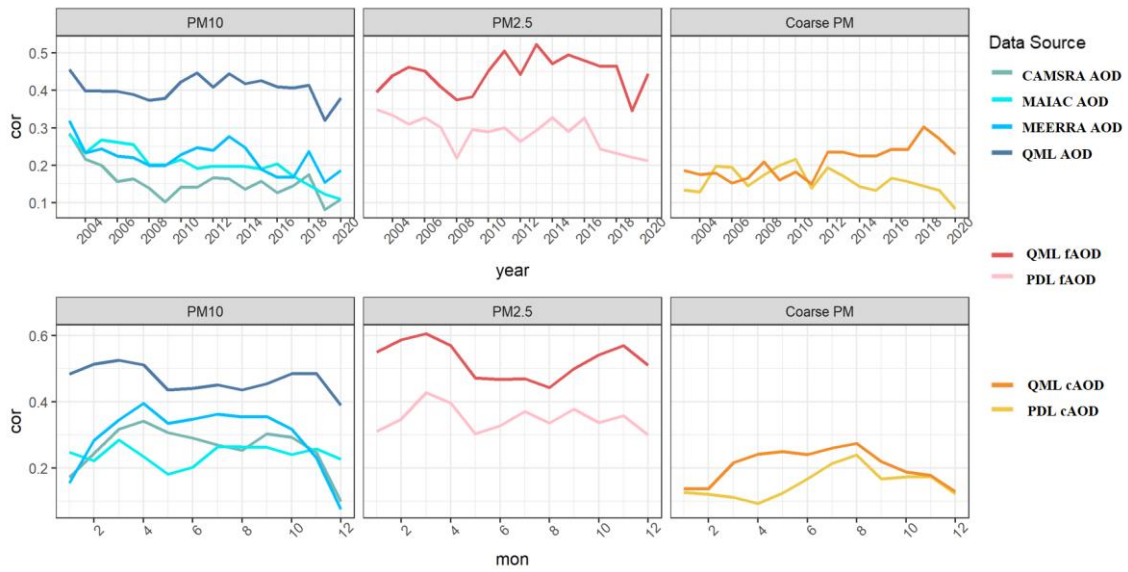

**Figure s13.** the spearman correlation between PM10 and total AOD products (CAMS, MERRA-2, Satellite AOD and QML AOD); PM2.5 and Fine-mode AOD products (PDL fAOD and QML fAOD); Coarse PM and coarse-mode AOD products (PDL cAOD and QML cAOD).

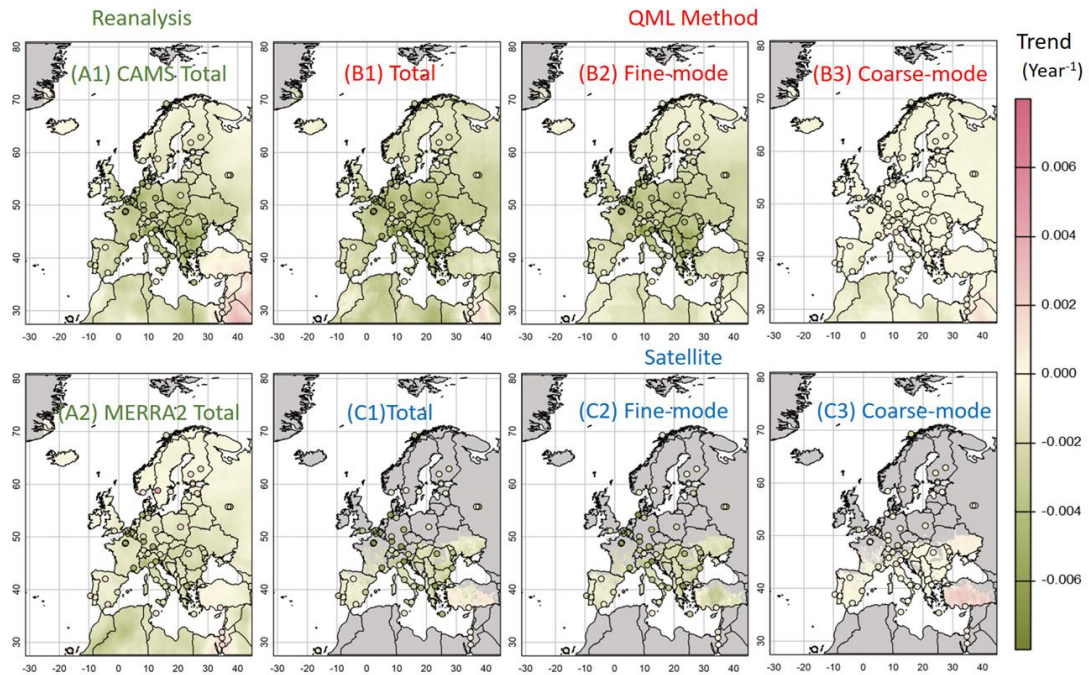

**Figure s14.** the maps of 18-year trend from 2003 to 2020: Reanalysis AOD (CAMS and MERRA-2) (A1-A2), QML product (AOD, fAOD and cAOD) (B1-B3), Satellite AOD (MAIAC AOD, PDL fAOD and PDL cAOD) (C1-C3) and the corresponding 46 ground-level sites, with more than ten years and at least 50 daily observation for each year.

## Supplementary Figure

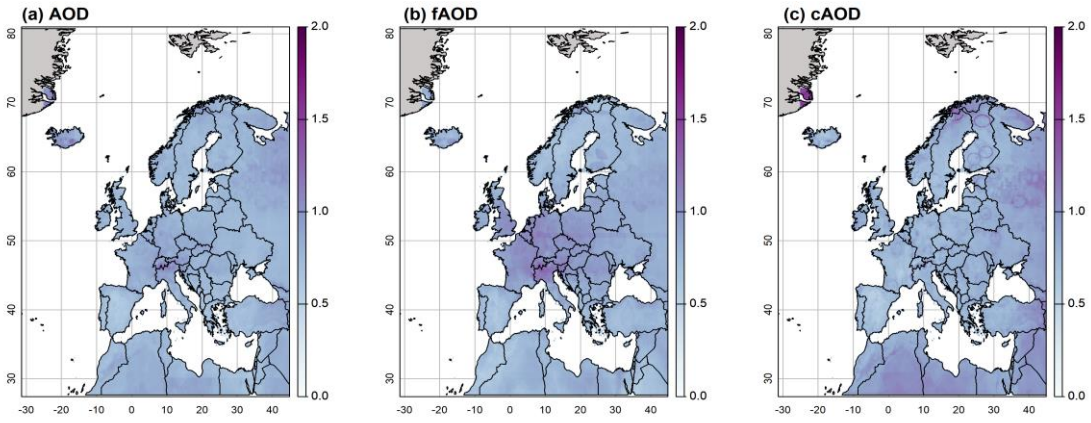

**Figure s15.** the averages of relative 90%-predictive-intervals width ( $RPIW = (90\% \text{ PI upper} - 90\% \text{ PI lower}) / \text{estimates}$ ) among tAOD, fAOD and cAOD products in the Pan European domain from 2003-2020. Higher RPIW means higher likelihood to obtain the uncertainty predictions.

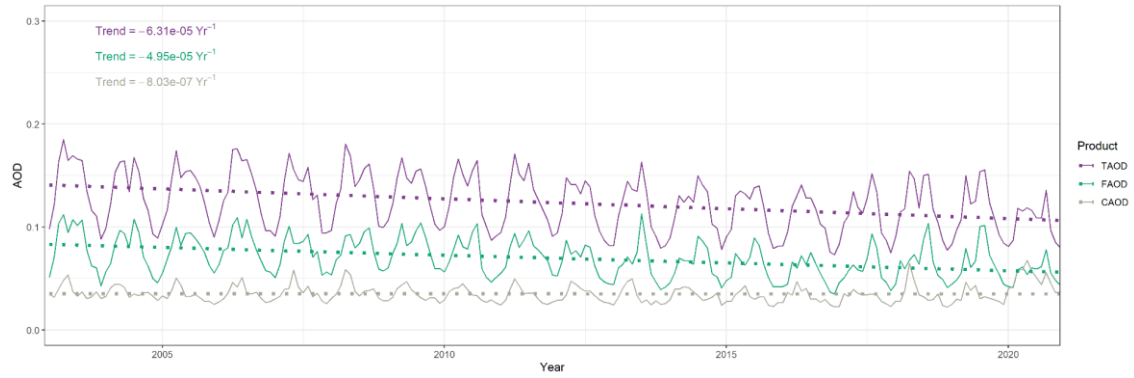

**Figure S16.** the time series of monthly mean tAOD, fAOD and cAOD products in the Pan European domain from 2003-2020.

Supplementary Table

2. Supplementary Table

**Table S1.** The comparison of model settings and results in spatial and temporal cross-validation

| <b>tAOD</b>                                |                                                                                                                                                                                                                              |                      |                       |
|--------------------------------------------|------------------------------------------------------------------------------------------------------------------------------------------------------------------------------------------------------------------------------|----------------------|-----------------------|
|                                            | Final <sup>a</sup>                                                                                                                                                                                                           | Spatial <sup>a</sup> | Temporal <sup>a</sup> |
| <b>Variables<sup>b</sup></b>               | u10, v10, rh, t2m, asn, bld, blh, mcc, lai_hv, lai_lv, lcc, msdwsurf, sp, tco3, aluvs, aluvs, Year, DOW, DOY, Lat, Lon, NE, SE, SW, NW, cams_bcaod550, cams_duaod550, cams_omaod550, cams_ssaod550, cams_suaod550, merra_aod |                      |                       |
| <b>Out-of-sample R-squared<sup>c</sup></b> | 0.72                                                                                                                                                                                                                         | 0.68-0.74            | 0.65-0.79             |
| <b>Max depth</b>                           | 18                                                                                                                                                                                                                           | 18(4);16(1)          | 18(3);17(2);16(1)     |
| <b>Subsample</b>                           | 0.8                                                                                                                                                                                                                          | 0.8(4);0.7(1)        | 0.8(4);0.9(2)         |
| <b>Learning rate</b>                       | 0.05                                                                                                                                                                                                                         | 0.05                 | 0.05                  |
| <b>Colsample by tree</b>                   | 0.8                                                                                                                                                                                                                          | 0.8(4);0.7(1)        | 0.8(4);0.7(2)         |
| <b>fAOD</b>                                |                                                                                                                                                                                                                              |                      |                       |
|                                            | Final                                                                                                                                                                                                                        | Spatial              | Temporal              |
| <b>Variables</b>                           | u10, v10, d2m, t2m, bld, blh, mcc, tcc, slt, msdwsurf, sp, tco3, tp, aluvs, aluvs, Year, DOW, DOY, Lat, Lon, NE, SE, SW, NW, cams_bcaod550, cams_duaod550, cams_omaod550, cams_ssaod550, cams_suaod550, merra_aod            |                      |                       |
| <b>Out-of-sample R-squared</b>             | 0.67                                                                                                                                                                                                                         | 0.65-0.73            | 0.61-0.75             |
| <b>Max depth</b>                           | 17                                                                                                                                                                                                                           | 17(3);18(2)          | 17(4);16(2)           |
| <b>Subsample</b>                           | 0.8                                                                                                                                                                                                                          | 0.8(4);0.7(1)        | 0.8(4);0.9(2)         |
| <b>Learning rate</b>                       | 0.05                                                                                                                                                                                                                         | 0.05                 | 0.05                  |
| <b>Colsample by tree</b>                   | 0.8                                                                                                                                                                                                                          | 0.8(4);0.7(1)        | 0.8(4);0.7(2)         |
| <b>cAOD</b>                                |                                                                                                                                                                                                                              |                      |                       |
|                                            | Final                                                                                                                                                                                                                        | Spatial              | Temporal              |
| <b>Variables</b>                           | u10, v10, d2m, t2m, bld, blh, mcc, lai_hv, lai_lv, lcc, msdwsurf, sp, tco3, aluvs, aluvs, Year, DOW, DOY, Lat, Lon, NE, SE, SW, NW, cams_bcaod550, cams_duaod550, cams_omaod550, cams_ssaod550, cams_suaod550, merra_aod     |                      |                       |
| <b>Out-of-sample R-squared</b>             | 0.68                                                                                                                                                                                                                         | 0.68-0.74            | 0.62-0.78             |
| <b>Max depth</b>                           | 15                                                                                                                                                                                                                           | 15(4);16(1)          | 16(3);15(2);14(1)     |
| <b>Subsample</b>                           | 0.8                                                                                                                                                                                                                          | 0.8(4);0.7(1)        | 0.8(5);0.7(1)         |
| <b>Learning rate</b>                       | 0.05                                                                                                                                                                                                                         | 0.05                 | 0.05                  |
| <b>Colsample by tree</b>                   | 0.8                                                                                                                                                                                                                          | 0.8(4);0.7(1)        | 0.8(5);0.7(1)         |

<sup>a</sup>Final: the final trained models; Spatial: five models generated by different spatial subsamples, Temporal: Six models generated by different temporal subsamples. And the numbers in brackets for each parameter means how many models selected this parameter settings by their own parameter validation.

<sup>b</sup> the names of variables shown Table s2

<sup>c</sup> The performance in test datasets (not involving in the model development and parameter optimization) for final models. The performance in the spatial/temporal test fold of sub-sample model.

<sup>d</sup> Max depth: higher mean higher complexity of trees; Subsample: Subsample ratio of the training instances for growing each tree, to control overfit problem; Learning Rate: Step size shrinkage used in update to prevents overfitting; Colsample by tree: hSubsample ratio of inputs used for growing each tree.

Supplementary Table

**Table S2.** The list of variables used in this study

| SHORT NAME     | SOURCE                       | LONG NAME                                                 | UNIT                                                           |
|----------------|------------------------------|-----------------------------------------------------------|----------------------------------------------------------------|
| U10            | ERA5                         | 10m u component of wind                                   | m s <sup>-1</sup>                                              |
| V10            | ERA5                         | 10m v component of wind                                   | m s <sup>-1</sup>                                              |
| RH             | ERA5                         | relatively humidity                                       | (0 - 100)                                                      |
| D2M            | ERA5                         | 2m dewpoint temperature                                   | K                                                              |
| T2M            | ERA5                         | 2m temperature                                            | K                                                              |
| BLD            | ERA5                         | boundary layer dissipation                                | J m <sup>-2</sup>                                              |
| BLH            | ERA5                         | boundary layer height                                     | m                                                              |
| HCC            | ERA5                         | high cloud cover                                          | (0 - 1)                                                        |
| LAI_HV         | ERA5                         | leaf area index high vegetation                           | m <sup>2</sup> m <sup>-2</sup>                                 |
| LAI_LV         | ERA5                         | leaf area index low vegetation                            | m <sup>2</sup> m <sup>-2</sup>                                 |
| TCC            | ERA5                         | total cloud cover                                         | (0 - 1)                                                        |
| LCC            | ERA5                         | low cloud cover                                           | (0 - 1)                                                        |
| SLT            | ERA5                         | soil type                                                 | 1-7, higher is finer soil with stronger ability contains water |
| MSDWSRF        | ERA5                         | mean surface downward short wave radiation flux           | W m <sup>-2</sup>                                              |
| ASN            | ERA5                         | snow albedo                                               | (0 - 1)                                                        |
| MCC            | ERA5                         | medium cloud cover                                        | (0 - 1)                                                        |
| SP             | ERA5                         | surface pressure                                          | Pa                                                             |
| TCO3           | ERA5                         | total column ozone                                        | J m <sup>-2</sup>                                              |
| TP             | ERA5                         | total precipitation                                       | m                                                              |
| ALUVD          | ERA5                         | uv visible albedo for diffuse radiation                   | (0 - 1)                                                        |
| ALUVP          | ERA5                         | uv visible albedo for direct radiation                    | (0 - 1)                                                        |
| YEAR           | Time                         | Year                                                      | \                                                              |
| DOW            | Time                         | day of week                                               | \                                                              |
| DOY            | Time                         | day of year                                               | \                                                              |
| LAT            | Spatial                      | latitude                                                  | \                                                              |
| LON            | Spatial                      | longitude                                                 | \                                                              |
| NE             | Minimum directional distance | minimum distance to nearest sites in North-east direction | m                                                              |
| SE             | Minimum directional distance | minimum distance to nearest sites in South-east direction | m                                                              |
| SW             | Minimum directional distance | minimum distance to nearest sites in South-west direction | m                                                              |
| NW             | Minimum directional distance | minimum distance to nearest sites in North-west direction | m                                                              |
| CAMS_BCA OD550 | CAMSRA                       | black carbon aerosol optical depth 550nm                  | \                                                              |
| CAMS_DU AOD550 | CAMSRA                       | dust aerosol optical depth 550nm                          | \                                                              |
| CAMS_OM AOD550 | CAMSRA                       | organic matter aerosol optical depth 550nm                | \                                                              |
| CAMS_SSA OD550 | CAMSRA                       | sea salt aerosol optical depth 550nm                      | \                                                              |
| CAMS_SUA OD550 | CAMSRA                       | sulphate aerosol optical depth 550nm                      | \                                                              |
| MERRA_A OD     | MERRA-2                      | MERRA2 aerosol optical depth 550nm                        | \                                                              |



Supplementary Table

**Table S3.** The performance comparison of additional techniques in parameter validation datasets (20% sites), with R-squared (Rsq), Root Mean Square Error (RMSE) and their standard deviation(SD).

|                                                                     | <b>tAOD</b> |            | <b>fAOD</b> |            | <b>cAOD</b> |             |
|---------------------------------------------------------------------|-------------|------------|-------------|------------|-------------|-------------|
| <b>All validation sites</b>                                         |             |            |             |            |             |             |
|                                                                     | Rsq(SD)     | RMSE(SD)   | Rsq(SD)     | RMSE(SD)   | Rsq(SD)     | RMSE(SD)    |
| <b>Origin (O)</b>                                                   | 0.64(0.20)  | 0.05(0.07) | 0.63(0.25)  | 0.03(0.05) | 0.61(0.35)  | 0.013(0.02) |
| <b>M1</b>                                                           | 0.64(0.17)  | 0.04(0.05) | 0.64(0.23)  | 0.02(0.04) | 0.62(0.33)  | 0.012(0.03) |
| <b>M2</b>                                                           | 0.66(0.10)  | 0.04(0.03) | 0.65(0.13)  | 0.02(0.01) | 0.63(0.17)  | 0.009(0.01) |
| <b>M3</b>                                                           | 0.71(0.12)  | 0.03(0.04) | 0.68(0.15)  | 0.02(0.03) | 0.67(0.20)  | 0.007(0.02) |
| <b>The validation sites far away from nearest sites<sup>a</sup></b> |             |            |             |            |             |             |
|                                                                     | Rsq(SD)     | RMSE(SD)   | Rsq(SD)     | RMSE(SD)   | Rsq(SD)     | RMSE(SD)    |
| <b>Origin (O)</b>                                                   | 0.42(0.25)  | 0.07(0.10) | 0.44(0.28)  | 0.04(0.05) | 0.36(0.28)  | 0.02(0.02)  |
| <b>M1</b>                                                           | 0.48(0.24)  | 0.06(0.04) | 0.47(0.26)  | 0.03(0.04) | 0.41(0.24)  | 0.015(0.02) |
| <b>M2</b>                                                           | 0.49(0.23)  | 0.05(0.03) | 0.48(0.22)  | 0.03(0.02) | 0.46(0.21)  | 0.013(0.02) |
| <b>M3</b>                                                           | 0.58(0.24)  | 0.04(0.04) | 0.56(0.21)  | 0.02(0.03) | 0.52(0.22)  | 0.011(0.02) |

<sup>a</sup> The distance from these sites to their nearest sites is larger than 463km (the average distance from 257 AERONET sites to their nearest sites)

<sup>b</sup> M1= O+ weighted loss function; M2= M1+ data augment; M3= M2 + minimum directional distance

Supplementary Table

**Table S3.** The main evaluation criteria used in this paper

| Criteria                                                     | Formula                                                                                                               | Function                                                                           | Range                                                                 |
|--------------------------------------------------------------|-----------------------------------------------------------------------------------------------------------------------|------------------------------------------------------------------------------------|-----------------------------------------------------------------------|
| <b>R-squared</b>                                             | $SS_{\text{regression}}/SS_{\text{total}}$                                                                            | Proportion of variance explained by models                                         | 0 to 1, higher is better                                              |
| <b>Normalized Mean Bias (NMB %)</b>                          | $\frac{\sum_{k=1}^n (Pred_k - Obs_k)}{\sum_{k=1}^n (Obs_k)}$                                                          | Overestimates/<br>Underestimates evaluation from normalized average forecast error | -Inf to Inf, closer to 0 is better                                    |
| <b>Normalized Root Mean Square Error (NRMSE %)</b>           | $\frac{\sqrt{\frac{\sum_{k=1}^n (Pred_k - Obs_k)^2}{N}}}{Avg(Obs)}$                                                   | Bias evaluation, give more weight to the largest errors.                           | 0 to Inf, lower is better                                             |
| <b>Predictive Intervals (PI) Coverage (%)</b>                | $N_{\text{within\_intervals}}/N$                                                                                      | Stability evaluation for PI                                                        | 0 to the PI levels it set (e.g., 90% for 90% PI), higher is better    |
| <b>Within 20% expected error envelopes (Within 20% EE %)</b> | $\frac{N_{\text{within\_EE}}}{N}$<br>EE: 0.05 ±20 % observation for AOD;<br>0.025 ±20 % observation for fAOD and cAOD | Evaluate how many sample's bias controlled within 20% error.                       | 0 to 100, higher is better                                            |
| <b>Robustness for R-squared</b>                              | $\frac{Var(R^2)}{Avg(R^2)}$                                                                                           | level of dispersion for cross-validation R-squared                                 | 0 to Inf, lower is better                                             |
| <b>Trend inconsistency (TI)</b>                              | $\left  \ln \left( \frac{T_{Pred}}{T_{Obs}} \right) \right $                                                          | Trend consistency index for Predictions and observation                            | 0 to Inf, closer to 0 is better.<br>Inf represent the opposite trends |

**Table S4.** The coverage and width of 90% predictive intervals (PI) for tAOD model in 10 bins

| tAOD Range       | N     | N of Coverage (%) | N of over-estimations <sup>a</sup> (%) | N of under-estimations <sup>b</sup> (%) | Interval width (avg) | Interval width (sd) |
|------------------|-------|-------------------|----------------------------------------|-----------------------------------------|----------------------|---------------------|
| <b>Spatial</b>   |       |                   |                                        |                                         |                      |                     |
| [0.00478,0.0424] | 26476 | 14636(55.28)      | 11457(43.27)                           | 550(2.08)                               | 0.068                | 0.045               |
| (0.0424,0.0584]  | 26493 | 22060(83.27)      | 4153(15.68)                            | 277(1.05)                               | 0.081                | 0.045               |
| (0.0584,0.0731]  | 26457 | 23360(88.29)      | 2328(8.8)                              | 768(2.9)                                | 0.092                | 0.048               |
| (0.0731,0.089]   | 26475 | 23688(89.47)      | 1536(5.8)                              | 1251(4.73)                              | 0.103                | 0.050               |
| (0.089,0.107]    | 26476 | 23386(88.33)      | 1547(5.84)                             | 1543(5.83)                              | 0.116                | 0.056               |
| (0.107,0.131]    | 26475 | 23406(88.41)      | 1022(3.86)                             | 2046(7.73)                              | 0.132                | 0.058               |
| (0.131,0.162]    | 26475 | 23281(87.94)      | 854(3.23)                              | 2338(8.83)                              | 0.149                | 0.062               |
| (0.162,0.205]    | 26475 | 22980(86.8)       | 501(1.89)                              | 2992(11.3)                              | 0.173                | 0.069               |
| (0.205,0.279]    | 26475 | 22383(84.54)      | 208(0.79)                              | 3883(14.67)                             | 0.207                | 0.080               |
| (0.279,1.99]     | 26476 | 18103(68.38)      | 45(0.17)                               | 8327(31.45)                             | 0.293                | 0.141               |
| <b>Temporal</b>  |       |                   |                                        |                                         |                      |                     |
| [0.00478,0.0424] | 26476 | 17611(66.52)      | 8171(30.86)                            | 724(2.73)                               | 0.056                | 0.040               |
| (0.0424,0.0584]  | 26493 | 22496(84.91)      | 3457(13.05)                            | 539(2.03)                               | 0.076                | 0.044               |
| (0.0584,0.0731]  | 26457 | 23616(89.26)      | 2031(7.68)                             | 808(3.05)                               | 0.090                | 0.047               |
| (0.0731,0.089]   | 26475 | 23953(90.47)      | 1380(5.21)                             | 1142(4.31)                              | 0.102                | 0.051               |
| (0.089,0.107]    | 26476 | 23800(89.89)      | 984(3.72)                              | 1691(6.39)                              | 0.115                | 0.055               |
| (0.107,0.131]    | 26475 | 23903(90.29)      | 805(3.04)                              | 1766(6.67)                              | 0.132                | 0.061               |
| (0.131,0.162]    | 26475 | 23721(89.6)       | 571(2.16)                              | 2183(8.25)                              | 0.149                | 0.064               |
| (0.162,0.205]    | 26475 | 23527(88.86)      | 398(1.5)                               | 2548(9.62)                              | 0.173                | 0.072               |
| (0.205,0.279]    | 26475 | 22727(85.84)      | 218(0.82)                              | 3528(13.33)                             | 0.209                | 0.085               |
| (0.279,1.99]     | 26476 | 20244(76.46)      | 44(0.17)                               | 6187(23.37)                             | 0.313                | 0.155               |

over-estimations<sup>a</sup>: the lower bounds of PI higher than the real tAOD, under-estimations<sup>b</sup>: the upper bounds of PI lower than the real tAOD

Supplementary Table

**Table S5.** The coverage and width of 90% predictive intervals (PI) for fAOD model in 10 bins

| fAOD Range        | N     | N of Coverage (%) | N of over-estimations <sup>a</sup> (%) | N of under-estimations <sup>β</sup> (%) | Interval width (avg) | Interval width (sd) |
|-------------------|-------|-------------------|----------------------------------------|-----------------------------------------|----------------------|---------------------|
| <b>Spatial</b>    |       |                   |                                        |                                         |                      |                     |
| [6.36e-05,0.0228] | 26475 | 16491(62.29)      | 9493(35.86)                            | 515(1.95)                               | 0.045                | 0.030               |
| (0.0228,0.0333]   | 26475 | 21423(80.92)      | 4508(17.03)                            | 546(2.06)                               | 0.060                | 0.037               |
| (0.0333,0.0433]   | 26475 | 23125(87.35)      | 2516(9.5)                              | 834(3.15)                               | 0.067                | 0.040               |
| (0.0433,0.0538]   | 26524 | 23221(87.55)      | 2105(7.94)                             | 1195(4.51)                              | 0.078                | 0.043               |
| (0.0538,0.0662]   | 26475 | 23734(89.65)      | 1342(5.07)                             | 1399(5.28)                              | 0.087                | 0.046               |
| (0.0662,0.0821]   | 26479 | 23781(89.81)      | 919(3.47)                              | 1779(6.72)                              | 0.102                | 0.050               |
| (0.0821,0.103]    | 26420 | 23666(89.58)      | 594(2.25)                              | 2160(8.18)                              | 0.117                | 0.054               |
| (0.103,0.134]     | 26475 | 23636(89.28)      | 316(1.19)                              | 2522(9.53)                              | 0.135                | 0.060               |
| (0.134,0.19]      | 26475 | 22533(85.11)      | 135(0.51)                              | 3806(14.38)                             | 0.163                | 0.069               |
| (0.19,1.97]       | 26475 | 18979(71.69)      | 17(0.06)                               | 7477(28.24)                             | 0.245                | 0.120               |
| <b>Temporal</b>   |       |                   |                                        |                                         |                      |                     |
| [6.36e-05,0.0228] | 26475 | 16701(63.08)      | 8973(33.89)                            | 860(3.25)                               | 0.037                | 0.029               |
| (0.0228,0.0333]   | 26475 | 21683(81.9)       | 4025(15.2)                             | 767(2.9)                                | 0.054                | 0.037               |
| (0.0333,0.0433]   | 26475 | 23320(88.08)      | 2228(8.42)                             | 927(3.5)                                | 0.064                | 0.040               |
| (0.0433,0.0538]   | 26524 | 23470(88.49)      | 1457(5.49)                             | 1596(6.02)                              | 0.075                | 0.045               |
| (0.0538,0.0662]   | 26475 | 23773(89.79)      | 1013(3.83)                             | 1688(6.38)                              | 0.085                | 0.048               |
| (0.0662,0.0821]   | 26479 | 23683(89.44)      | 738(2.79)                              | 2058(7.77)                              | 0.101                | 0.053               |
| (0.0821,0.103]    | 26420 | 23870(90.35)      | 459(1.74)                              | 2091(7.91)                              | 0.116                | 0.058               |
| (0.103,0.134]     | 26475 | 23523(88.85)      | 249(0.94)                              | 2702(10.21)                             | 0.135                | 0.063               |
| (0.134,0.19]      | 26475 | 22602(85.37)      | 112(0.42)                              | 3760(14.2)                              | 0.167                | 0.075               |
| (0.19,1.97]       | 26475 | 19896(75.15)      | 8(0.03)                                | 6569(24.81)                             | 0.260                | 0.134               |

over-estimations<sup>a</sup>: the lower bounds of PI higher than the real fAOD, under-estimations<sup>β</sup>: the upper bounds of PI lower than the real fAOD

Supplementary Table

**Table S6.** The coverage and width of 90% predictive intervals (PI) for cAOD model in 10 bins

| fAOD Range         | N     | N of Coverage (%) | N of over-estimations <sup>a</sup> (%) | N of under-estimations <sup>b</sup> (%) | Interval width (avg) | Interval width (sd) |
|--------------------|-------|-------------------|----------------------------------------|-----------------------------------------|----------------------|---------------------|
| <b>Spatial</b>     |       |                   |                                        |                                         |                      |                     |
| [5.06e-09,0.00649] | 26660 | 4358(16.35)       | 21502(80.65)                           | 29(0.11)                                | 0.034                | 0.020               |
| (0.00649,0.0106]   | 26439 | 16172(61.17)      | 9472(35.83)                            | 199(0.75)                               | 0.038                | 0.021               |
| (0.0106,0.0155]    | 26381 | 22649(85.85)      | 2411(9.14)                             | 119(0.45)                               | 0.039                | 0.022               |
| (0.0155,0.0211]    | 26494 | 23978(90.5)       | 1065(4.02)                             | 237(0.89)                               | 0.042                | 0.021               |
| (0.0211,0.0267]    | 26493 | 23002(86.82)      | 1108(4.18)                             | 794(3)                                  | 0.045                | 0.025               |
| (0.0267,0.0331]    | 26544 | 22460(84.61)      | 702(2.64)                              | 1883(7.09)                              | 0.048                | 0.025               |
| (0.0331,0.0425]    | 26443 | 20763(78.52)      | 666(2.52)                              | 2934(11.1)                              | 0.050                | 0.027               |
| (0.0425,0.0595]    | 26493 | 18940(71.49)      | 810(3.06)                              | 5051(19.07)                             | 0.060                | 0.035               |
| (0.0595,0.104]     | 26703 | 17382(65.09)      | 505(1.89)                              | 6784(25.41)                             | 0.088                | 0.048               |
| (0.104,1.87]       | 26284 | 17083(64.99)      | 1013(3.85)                             | 7338(27.92)                             | 0.173                | 0.113               |
| <b>Temporal</b>    |       |                   |                                        |                                         |                      |                     |
| [5.06e-09,0.00649] | 26660 | 8678(32.55)       | 16778(62.93)                           | 450(1.69)                               | 0.035                | 0.022               |
| (0.00649,0.0106]   | 26439 | 16831(63.66)      | 8869(33.55)                            | 139(0.53)                               | 0.039                | 0.023               |
| (0.0106,0.0155]    | 26381 | 23438(88.84)      | 1528(5.79)                             | 211(0.8)                                | 0.039                | 0.022               |
| (0.0155,0.0211]    | 26494 | 24300(91.72)      | 674(2.54)                              | 306(1.15)                               | 0.044                | 0.023               |
| (0.0211,0.0267]    | 26493 | 23458(88.54)      | 1036(3.91)                             | 410(1.55)                               | 0.046                | 0.025               |
| (0.0267,0.0331]    | 26544 | 23471(88.42)      | 654(2.46)                              | 920(3.47)                               | 0.049                | 0.024               |
| (0.0331,0.0425]    | 26443 | 22110(83.61)      | 349(1.32)                              | 1905(7.2)                               | 0.052                | 0.027               |
| (0.0425,0.0595]    | 26493 | 20512(77.42)      | 465(1.76)                              | 3825(14.44)                             | 0.063                | 0.032               |
| (0.0595,0.104]     | 26703 | 19514(73.08)      | 352(1.32)                              | 4806(18)                                | 0.090                | 0.043               |
| (0.104,1.87]       | 26284 | 19872(75.6)       | 116(0.44)                              | 5447(20.72)                             | 0.177                | 0.113               |

over-estimations<sup>a</sup>: the lower bounds of PI higher than the real cAOD, under-estimations<sup>b</sup>: the upper bounds of PI lower than the real cAOD

**Table S7.** The spearman correlation between different-size particulate matter (PM10, PM2.5, Coarse PM (from 2.5 to 10 micrometers)) and different AOD products.

|                  | PM10   | PM25   | Coarse PM |
|------------------|--------|--------|-----------|
| <b>QML AOD</b>   | 0.414* | 0.392* | 0.205*    |
| <b>MAIAC AOD</b> | 0.227* | 0.166* | 0.165*    |
| <b>MERRA AOD</b> | 0.234* | 0.183* | 0.158*    |
| <b>CAMS AOD</b>  | 0.170* | 0.096* | 0.157*    |
| <b>QML fAOD</b>  | 0.375* | 0.446* | 0.099*    |
| <b>PDL fAOD</b>  | 0.285* | 0.285* | 0.135*    |
| <b>QML cAOD</b>  | 0.181* | 0.021  | 0.258*    |
| <b>PDL cAOD</b>  | 0.119* | 0.011  | 0.163*    |

\*with significant Spatial R

### 3. Preliminary analysis for satellite AOD

#### 3.1 Study design

In the preliminary study, we designed three different routes for the comparison: Route A: without Satellite AOD; Route B: Satellite AOD Included; Route C: gap-filled Satellite AOD included are developed to compare and to determine the optimal model structure (Figure B1). The Route A is to train the Non-sat model without additional satellite data, well described in the manuscript.

The Route B is to answer whether the satellite AOD can bring more benefits to the models, under its relatively high spatial resolution. Due to the high missing rate of satellite data, this route needs to split the dataset into two scenarios: “Sat scenario” and “Non-Sat scenario”. For the sat scenario, we built the satellite calibration model to dig out the potential relationship between satellite MAIAC AOD and AERONET AOD. For the rest scenario, it remains the same model structure as Route A.

As for the route C, they try to answer whether we can maximize the information usage of satellite AOD observation. There are two stages in route C: First stage is designed to fill the missing gaps of MAIAC AOD, though modelling with reanalysis and other data. The route C assumed that splitting scenarios (like route B) may cause some discontinues surface while merging two scenarios´ data, and this discontinuous distribution may further lead to some bias in the future application. Second stage is to calibrate the missing-filled MAIAC AOD.

#### 3.2 Preliminary results

Given in the high missing rate of Satellite AOD (75.79%) in our research domain during 2003-2020, three models route (Route A: without Satellite AOD; Route B: Satellite AOD Included; Route C: missing-filled Satellite AOD included) are developed to evaluate the contribution from satellite AOD, and to determine the optimal model structure. Figure s15 shows the radar plot for three different model routes under Six dimensions: Spatial and Temporal Accuracy (Spatial and Temporal CV R<sup>2</sup>); Spatial and Temporal Robustness (the variation coefficients of Spatial CV R<sup>2</sup> among different locations and Temporal CV R<sup>2</sup> among different years); simplicity (the numbers of models required); Correlation with PM2.5. Notedly, for simplicity, there is only one model for Route A, while there are two for Route B (Route A model+ Sat Model) and Route C (gap-filled model+ Sat Model).

## Preliminary analysis for satellite AOD

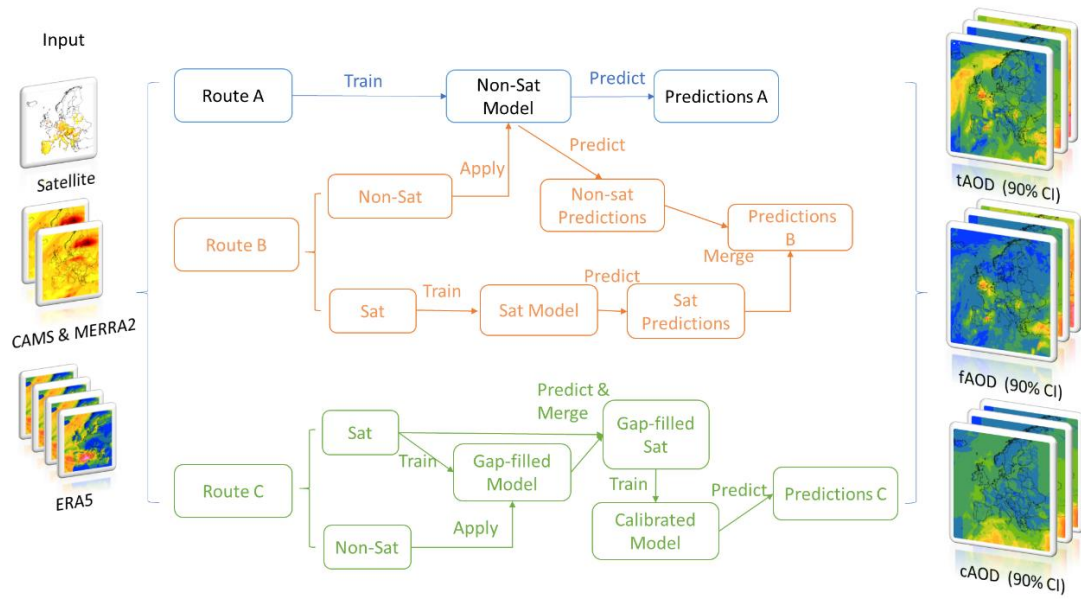

**Figure s15.** the workflows for three different model routes

For the total AOD (Fig s16(a)), the Spatial and temporal performance among three different model routes are similar (Temporal CV  $R^2_{Route A VS B VS C}=0.715 VS 0.718 VS 0.718$ ; Spatial CV  $R^2_{Route A VS B VS C}=0.691 VS 0.696 VS 0.695$ ), and Satellite AOD only bring small improvement (0.015 in Spatial CV  $R^2$ ). There is no difference between different satellite AOD applications: Building separate models for satellite AOD (Route B) and using gap-filled satellite AOD (Route C). In another word, the gap-filled product based on association between satellite AOD and meteorological factors cannot provide extra information for estimating AERONet AOD data.

## Preliminary analysis for satellite AOD

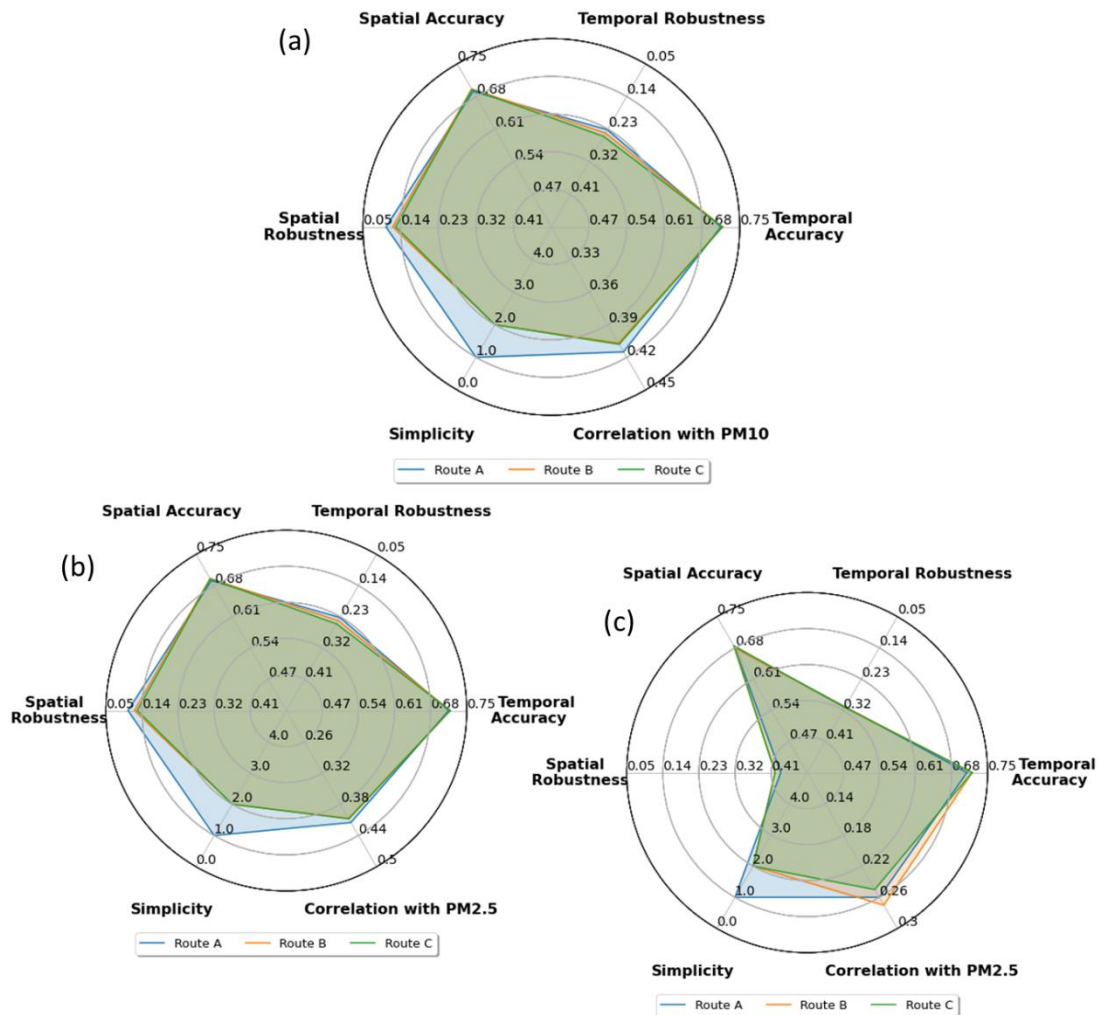

**Figure s16.** the radar plot for estimated AOD by three different routes (Route A (blue): without Satellite AOD; Route B (orange): Satellite AOD Included; Route C (green): missing-filled Satellite AOD included) under three different AOD product (tAOD (a), fAOD (b) and cAOD (c)). The Six dimensions in radar plot: Spatial and Temporal Accuracy (Spatial and Temporal  $CV R^2$ ); Spatial and Temporal Robustness (the variation coefficients of Spatial  $CV R^2$  among different locations and Temporal  $CV R^2$  among different years); simplicity (the steps required); Correlation with  $PM_{2.5}$ .

To further figure out the reason of the small contribution from satellite AOD (Figure s17), we divided the validation results into two scenarios: "Sat scenario" and "Non-Sat scenario" (satellite MAIAC AOD are available or not). In the Sat scenarios, using the satellite AOD (Route B and Route C) can bring 0.061-0.069 improvement (Spatial  $CV R^2_{Route A VS B VS C}=0.727 VS 0.796 VS 0.788$ ), but three model routes have almost same performance (Spatial  $CV R^2_{Route A VS B VS C}=0.623 VS 0.623 VS 0.622$ ) during the Non-Sat scenario. However, the Sat scenario only accounts for 36.3% of 224,369 matching datasets, so model improvements in the Sat scenario cannot make a big change in overall performance. Furthermore, the fraction of Sat scenarios in the whole domain (24.21%) is smaller than AERONET matching datasets (36.30%) the weather condition, as the requirement between AERONET site and Satellite is a bit similar: sunlight cannot be blocked by clouds during measurements (for AERONET) or clear sky (for satellite) (Flag et al., 2015; Holben et al., 2006; GLOBE 2010). In another word, the differences among different routes (whether using satellite AOD as input) will be even smaller when they are applied in the whole domain.

## Preliminary analysis for satellite AOD

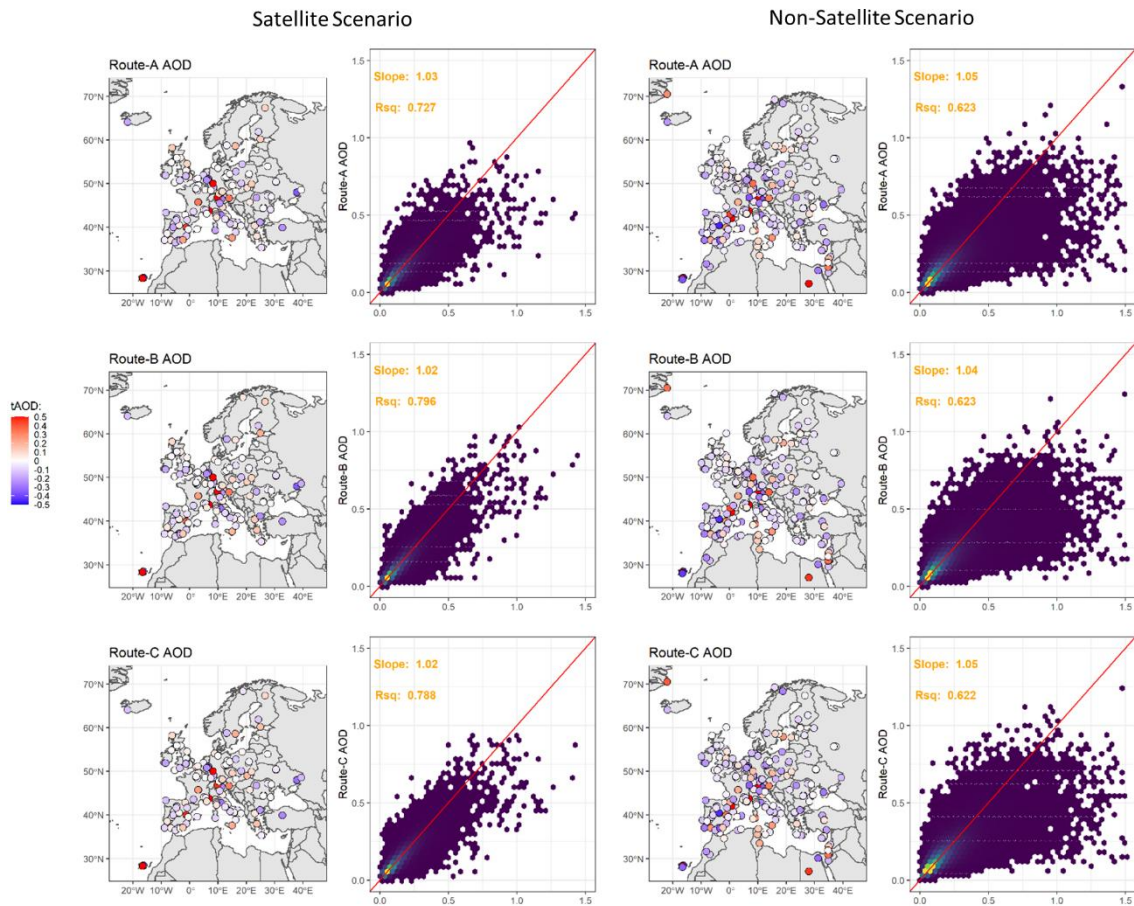

**Figure s17.** the spatial distribution maps of normalize mean bias (NMB) and scatter plots of tAOD estimation bias (Estimation minus AERONet data) for different data sources in 2003-2020.

And Route A have a bit more robust (lower variation coefficients) validation results among different locations and years (Temporal Robustness<sub>Route A VS B VS C</sub>=0.232 VS 0.241 Vs 0.250; Spatial Robustness<sub>Route A VS B VS C</sub>=0.105 VS 0.121 VS 0.128). The potential reason why adding satellite AOD as inputs will weaken the result robustness is that the Route B and C only improve the performance in Sat scenarios, and different locations or years generally have different missing rates, so it will bring more variance in the results. As for the correlation between ground-level PM<sub>2.5</sub> and tAOD estimation from three different model routes, the Route A has slightly higher correlation than other two routes (R=0.418 VS 0.415 Vs 0.413).

For fAOD and cAOD (Fig s16 (b) and (c)), they have similar results as the tAOD product: three different models routes have similar performance but Route A is simpler (takes one less model than other routes). Thus, we will mainly discuss and compare the Route A with other aerosol products in the following section. In the subgroup analysis, Route B and C still mainly improve the performance in Sat scenarios for fAOD and cAOD (Figure 18 and 19), but the smaller fraction of Sat scenarios is still the main reason for small differences between three model routes.



## Preliminary analysis for satellite AOD

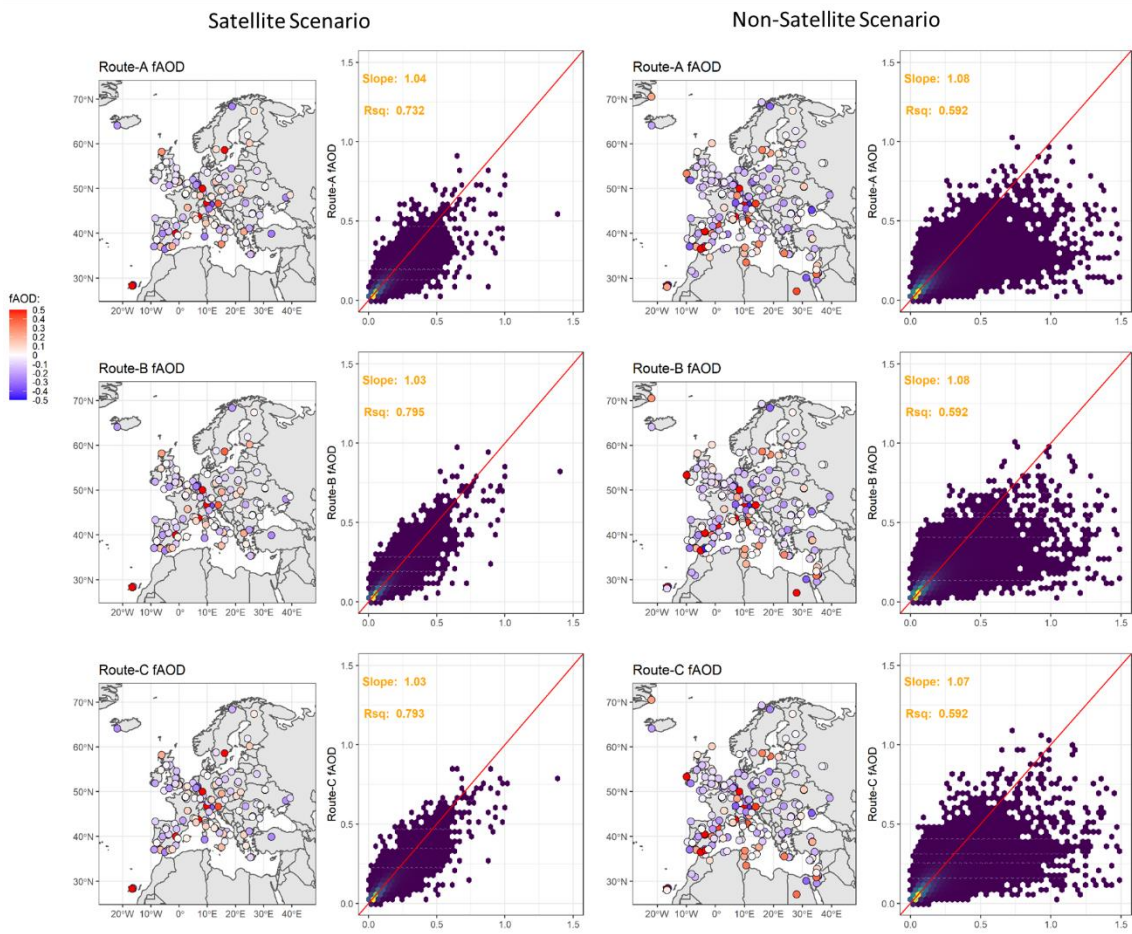

**Figure s18.** the spatial distribution maps of normalize mean bias (NMB) and scatter plots of fAOD estimation bias (Estimation minus AERONet data) for different data sources in 2003-2020.

## Preliminary analysis for satellite AOD

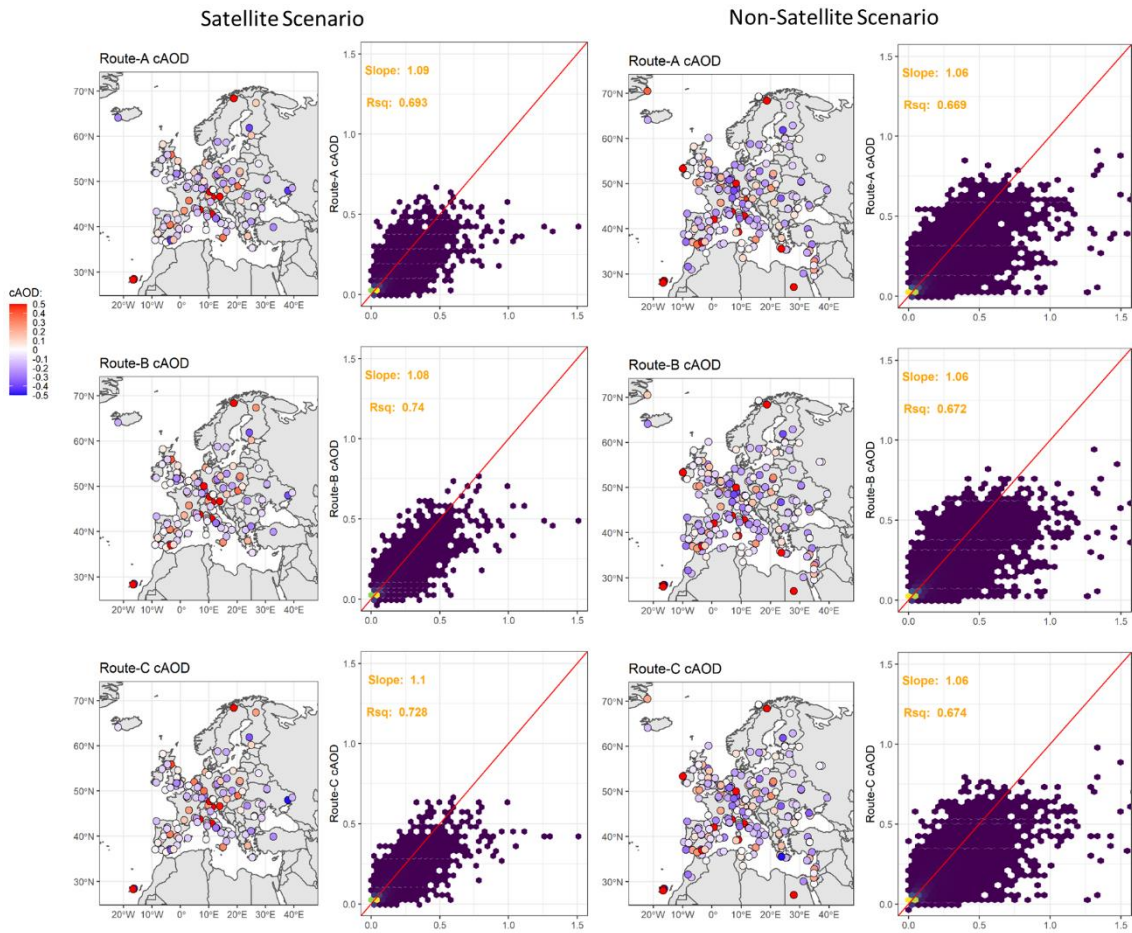

**Figure s19.** the spatial distribution maps of normalize mean bias (NMB) and scatter plots of cAOD estimation bias (Estimation minus AERONet data) for different data sources in 2003-2020.
